# Supplementary material for: Measuring Quality Gaps in TB Screening in South Africa Using Standardised Patient Analysis
Source: MDPI journal article supplement (doi:10.3390/ijerph15040729), 2018-04-12
Supplement: s1 [file s1]

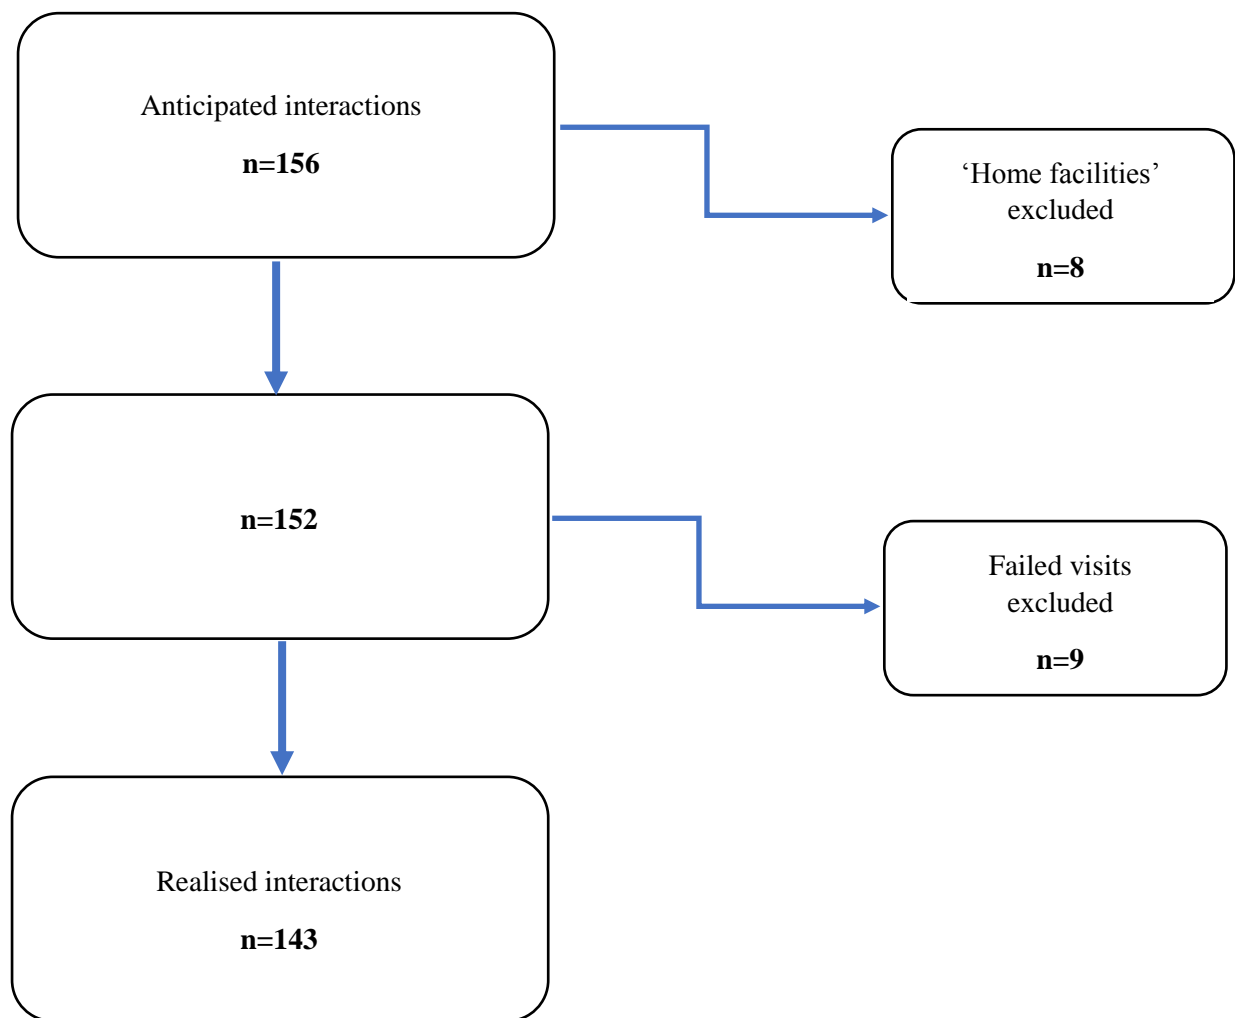

**Figure S1: Exclusions from standardised patient-facility interactions**

'Home facility' refers to a primary healthcare facility that the SP used regularly. Failed visits were defined as an SP not entering the facility or being turned away from the facility at any point before being seen by a healthcare worker.

**Table S1: List of external reviewers of TB screening instruments**

| <b>Department, Institution</b>                                                                                                  | <b>Job Title</b>                | <b>Inputs</b>                                                                                                                                      |
|---------------------------------------------------------------------------------------------------------------------------------|---------------------------------|----------------------------------------------------------------------------------------------------------------------------------------------------|
| Health Impact Assessment Unit,<br>Department of Health, Western Cape<br>Government                                              | Public Health Specialist (1)    | Provided referrals to relevant stakeholders for review of instruments.                                                                             |
|                                                                                                                                 | Public Health Specialist (2)    | Provided the relevant TB guidelines. Reviewed early versions of the instruments.                                                                   |
| Desmond Tutu TB Centre, Stellenbosch<br>University                                                                              | Research Clinician (1)          | Provided clinical expertise when drafting instruments. Reviewed instruments.                                                                       |
|                                                                                                                                 | Research Clinician (2)          | Provided clinical expertise when drafting instruments. Reviewed instruments.                                                                       |
| Facility-based Programmes, Department<br>of Health, Western Cape Government                                                     | Programme Manager               | Provided insights about integrated approach to primary healthcare assessment. Ensured that instruments contained integrated clinical questions.    |
| HAST (HIV & AIDS, STI and TB)<br>Directorate: TB Prevention and<br>Management, Department of Health,<br>Western Cape Government | Deputy Director                 | Provided insights about the current management of presumed TB patients at primary healthcare facilities. Reviewed instruments and provided inputs. |
|                                                                                                                                 | Assistant Deputy Director       | Provided insights about the current management of presumed TB patients at primary healthcare facilities. Reviewed instruments.                     |
| Integrated Strategic Management, Eastern<br>Cape Government Department of Health                                                | Chief Director                  | Provided referrals to relevant stakeholders for review of instruments.                                                                             |
| TB Directorate, Department of Health,<br>Eastern Cape Government                                                                | Provincial Programme<br>Manager | Provided insights about the current management of presumed TB patients at primary healthcare facilities. Reviewed instruments and provided inputs. |

Instruments include both the TB screening script and score sheet.

**Table S2: Standardised patient characteristics (n=8)**

| <b>Characteristic</b> |           | <b>n (%)</b> |
|-----------------------|-----------|--------------|
| <b>Gender</b>         | Male      | 4 (50)       |
|                       | Female    | 4 (50)       |
| <b>Age</b>            | <30 years | 4 (50)       |
|                       | ≥30 years | 4 (50)       |
| <b>Race</b>           | Black     | 6 (75)       |
|                       | Coloured  | 2 (25)       |
| <b>Education</b>      | < Matric  | 1 (12.5)     |
|                       | Matric    | 3 (37.5)     |
|                       | > Matric  | 4 (50)       |

Matric is the final year of secondary schooling, i.e. 12 years of education completed and passed.

In South Africa there are four main racial classifications – Black, Coloured, White and Indian.

**Table S3: Failed visit rate of standardised patients**

|                                                        |              |
|--------------------------------------------------------|--------------|
|                                                        | <b>Total</b> |
| <b>Anticipated SP interactions</b>                     | n=156        |
| <b>Facility not visited since SP's 'home facility'</b> | n=4          |
| <b>Failed visits</b>                                   | n=9          |
| <b>Realised SP interactions</b>                        | n=143        |
| <b>Failed visit rate</b>                               | 0.06         |

'Home facility' refers to a primary healthcare facility that the SP used regularly.

Failed visits were defined as an SP not entering the facility or being turned away from the facility at any point before being seen by a healthcare worker.

Table S4: Summary statistics of variables of interest

| Variable                                              | Observations | Mean     | Std. Dev. | Min | Max |
|-------------------------------------------------------|--------------|----------|-----------|-----|-----|
| Adequately managed                                    | 143          | .4265734 | .4963176  | 0   | 1   |
| TB test conducted                                     | 143          | .8391608 | .3686739  | 0   | 1   |
| HIV test offered                                      | 143          | .4685315 | .5007627  | 0   | 1   |
| Asked about household TB contacts                     | 143          | .5384615 | .5002708  | 0   | 1   |
| Opening statement only 'coughing a lot'               | 136          | .9117647 | .2846854  | 0   | 1   |
| Asked about cough duration                            | 142          | .8028169 | .3992801  | 0   | 1   |
| Asked about night sweats                              | 143          | .5874126 | .4940302  | 0   | 1   |
| Asked about weight loss                               | 143          | .5454545 | .4996798  | 0   | 1   |
| Asked about fever duration                            | 143          | .2517483 | .4355429  | 0   | 1   |
| Blood pressure measured                               | 141          | .4326241 | .4972060  | 0   | 1   |
| Weight measured                                       | 141          | .3829787 | .4878462  | 0   | 1   |
| Pulse checked                                         | 140          | .1285714 | .3359269  | 0   | 1   |
| Temperature taken                                     | 141          | .1560284 | .3641759  | 0   | 1   |
| Temperature taken if asked about fever duration       | 36           | .2222222 | .421637   | 0   | 1   |
| Antibiotics prescribed without taking temperature     | 119          | .0840336 | .2786113  | 0   | 1   |
| Access to surgical mask                               | 143          | .4825175 | .5014507  | 0   | 1   |
| Return for TB test results communicated               | 103          | .8543689 | .3544608  | 0   | 1   |
| Explained importance of returning for TB test results | 119          | .2773109 | .4495642  | 0   | 1   |

Table S5: One-way ANOVA of variables of interest by standardised patient and facility

| Variable                                              | Between standardised patients |              |          | Between facilities |              |          |
|-------------------------------------------------------|-------------------------------|--------------|----------|--------------------|--------------|----------|
|                                                       | Lowest mean                   | Highest mean | Prob > F | Lowest mean        | Highest mean | Prob > F |
| Adequately managed                                    | .05263158                     | 1            | 0.0000   | 0                  | 1            | 0.0000   |
| TB test conducted                                     | .36842105                     | 1            | 0.0000   | .5                 | 1            | 0.5284   |
| HIV test offered                                      | .05263158                     | 1            | 0.0001   | 0                  | 1            | 0.0000   |
| Asked about household TB contacts                     | 0                             | .89473684    | 0.0002   | 0                  | 1            | 0.5665   |
| Opening statement only 'coughing a lot'               | .68421053                     | 1            | 0.0004   | .5                 | 1            | 0.7803   |
| Asked about cough duration                            | .47368421                     | 1            | 0.0020   | .33333333          | 1            | 0.5941   |
| Asked about night sweats                              | .10526316                     | 1            | 0.0000   | .25                | 1            | 0.3508   |
| Asked about weight loss                               | .31578947                     | 1            | 0.0558   | 0                  | 1            | 0.1764   |
| Asked about fever duration                            | 0                             | .52631579    | 0.0004   | 0                  | 1            | 0.1751   |
| Blood pressure measured                               | 0                             | .8           | 0.0524   | 0                  | 1            | 0.0040   |
| Weight measured                                       | 0                             | .52631579    | 0.7884   | 0                  | 1            | 0.0000   |
| Pulse checked                                         | 0                             | .53333333    | 0.0000   | 0                  | .5           | 0.8192   |
| Temperature taken                                     | 0                             | .33333333    | 0.3495   | 0                  | .75          | 0.0004   |
| Temperature taken if asked about fever duration       | 0                             | .66666667    | 0.3638   | 0                  | 1            | 0.7215   |
| Antibiotics prescribed without taking temperature     | 0                             | .47058824    | 0.0000   | 0                  | .66666667    | 0.6943   |
| Access to surgical mask                               | .6875                         | 1            | 0.0018   | 0                  | 1            | 0.0005   |
| Return for TB test results communicated               | .5625                         | 1            | 0.0059   | 0                  | 1            | 0.0691   |
| Explained importance of returning for TB test results | 0                             | .69230769    | 0.0030   | 0                  | 1            | 0.0031   |

Standardised patient: n=8; Facility: n=39.

Table S6: One-way ANOVA of variables of interest by gender and age

| Variable                                              | Between genders |            |          | Between age categories |                 |          |
|-------------------------------------------------------|-----------------|------------|----------|------------------------|-----------------|----------|
|                                                       | Men mean        | Women mean | Prob > F | ≤ 30 years mean        | > 30 years mean | Prob > F |
| Adequately managed                                    | .43478261       | .41891892  | 0.8493   | .375                   | .50909091       | 0.1163   |
| TB test conducted                                     | .92753623       | .75675676  | 0.0052   | .80681818              | .89090909       | 0.1855   |
| HIV test offered                                      | .44927536       | .48648649  | 0.6586   | .40909091              | .56363636       | 0.0725   |
| Asked about household TB contacts                     | .71014493       | .37837838  | 0.0000   | .67045455              | .32727273       | 0.0000   |
| Opening statement only 'coughing a lot'               | .92424242       | .9         | 0.6215   | .87058824              | .98039216       | 0.0289   |
| Asked about cough duration                            | .82608696       | .78082192  | 0.5015   | .86363636              | .7037037        | 0.0200   |
| Asked about night sweats                              | .68115942       | .5         | 0.0279   | .70454545              | .4              | 0.0003   |
| Asked about weight loss                               | .66666667       | .43243243  | 0.0047   | .59090909              | .47272727       | 0.1697   |
| Asked about fever duration                            | .23188406       | .27027027  | 0.6002   | .29545455              | .18181818       | 0.1295   |
| Blood pressure measured                               | .46376812       | .40277778  | 0.4685   | .47727273              | .35849057       | 0.1703   |
| Weight measured                                       | .36231884       | .40277778  | 0.6242   | .35227273              | .43396226       | 0.3373   |
| Pulse checked                                         | .15942029       | .09859155  | 0.2857   | .18181818              | .03846154       | 0.0142   |
| Temperature taken                                     | .17391304       | .13888889  | 0.5699   | .15909091              | .1509434        | 0.8982   |
| Temperature taken if asked about fever duration       | .25             | .2         | 0.7292   | .19230769              | .3              | 0.5004   |
| Antibiotics prescribed without taking temperature     | .03508772       | .12903226  | 0.0659   | .13513514              | 0               | 0.0097   |
| Access to surgical mask                               | .52173913       | .44594595  | 0.3683   | .5                     | .45454545       | 0.5997   |
| Return for TB test results communicated               | .8852459        | .80952381  | 0.2889   | .88235294              | .8              | 0.2661   |
| Explained importance of returning for TB test results | .21875          | .34545455  | 0.1258   | .21126761              | .375            | 0.0509   |

Men: n=4; Women: n=4; ≤ 30 years: n=5; > 30 years: n=3.
